# Supplementary material for: Glycowork: A Python package for glycan data science and machine learning
Source: PubMed Central journal article supplement — Glycobiology. 2021 Jun 29;31(10):1240–4. doi: 10.1093/glycob/cwab067 (PMC8600276; doi:10.1093/glycob/cwab067), 2021-06-29
Supplement: glyco-2021-00065r1_si_cwab067.pdf [file glyco-2021-00065r1_si_cwab067.pdf]

## **Glycowork: A Python package for glycan data science and machine learning**

Luc Thomès<sup>1</sup>, Rebekka Burkholz<sup>2</sup>, Daniel Bojar<sup>1,\*</sup>

<sup>1</sup>Department of Chemistry and Molecular Biology, University of Gothenburg, Gothenburg, Sweden.  
Wallenberg Centre for Molecular and Translational Medicine, University of Gothenburg, Gothenburg,  
Sweden.

<sup>2</sup>Department of Biostatistics, Harvard School of Public Health, Boston, MA, USA

\*Corresponding author: [daniel.bojar@gu.se](mailto:daniel.bojar@gu.se)

## Supplementary Figures

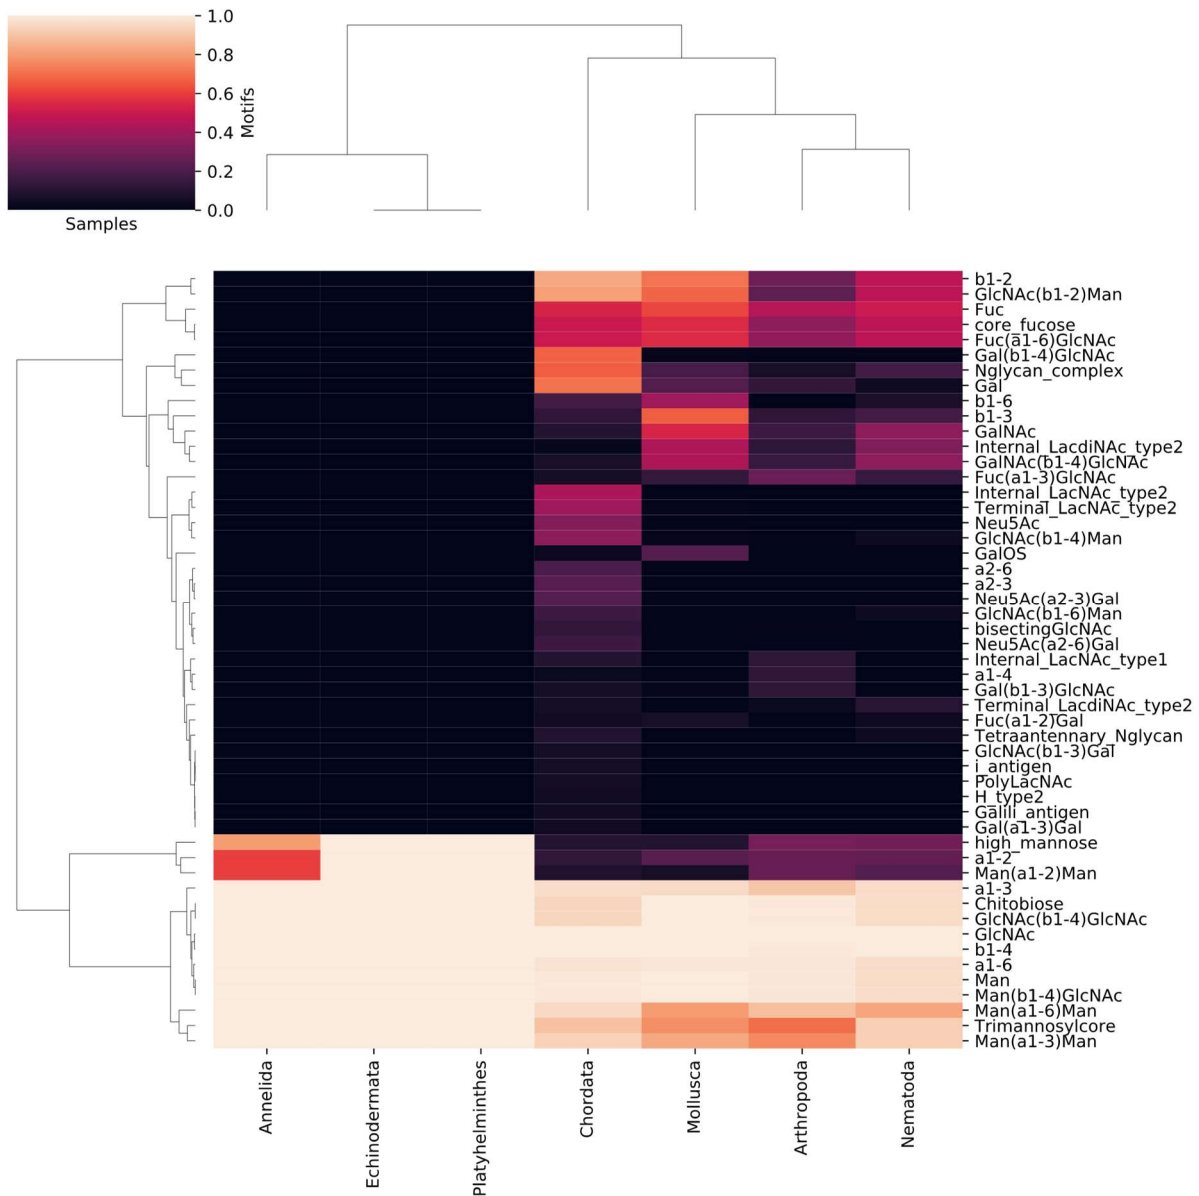

**Figure S1. Heatmap of glycan motif distribution among animal phyla.** Related to Figure 2A. The heatmap is generated using the `make_heatmap` function and represents glycan motif distributions from animal N-linked glycans. Colors indicate the relative abundance of glycan motifs in each phylum. Motifs are labeled and correspond either to monosaccharides, linkages, disaccharides, or to larger structures such as polylactosamine repeats (PolyLacNAc).

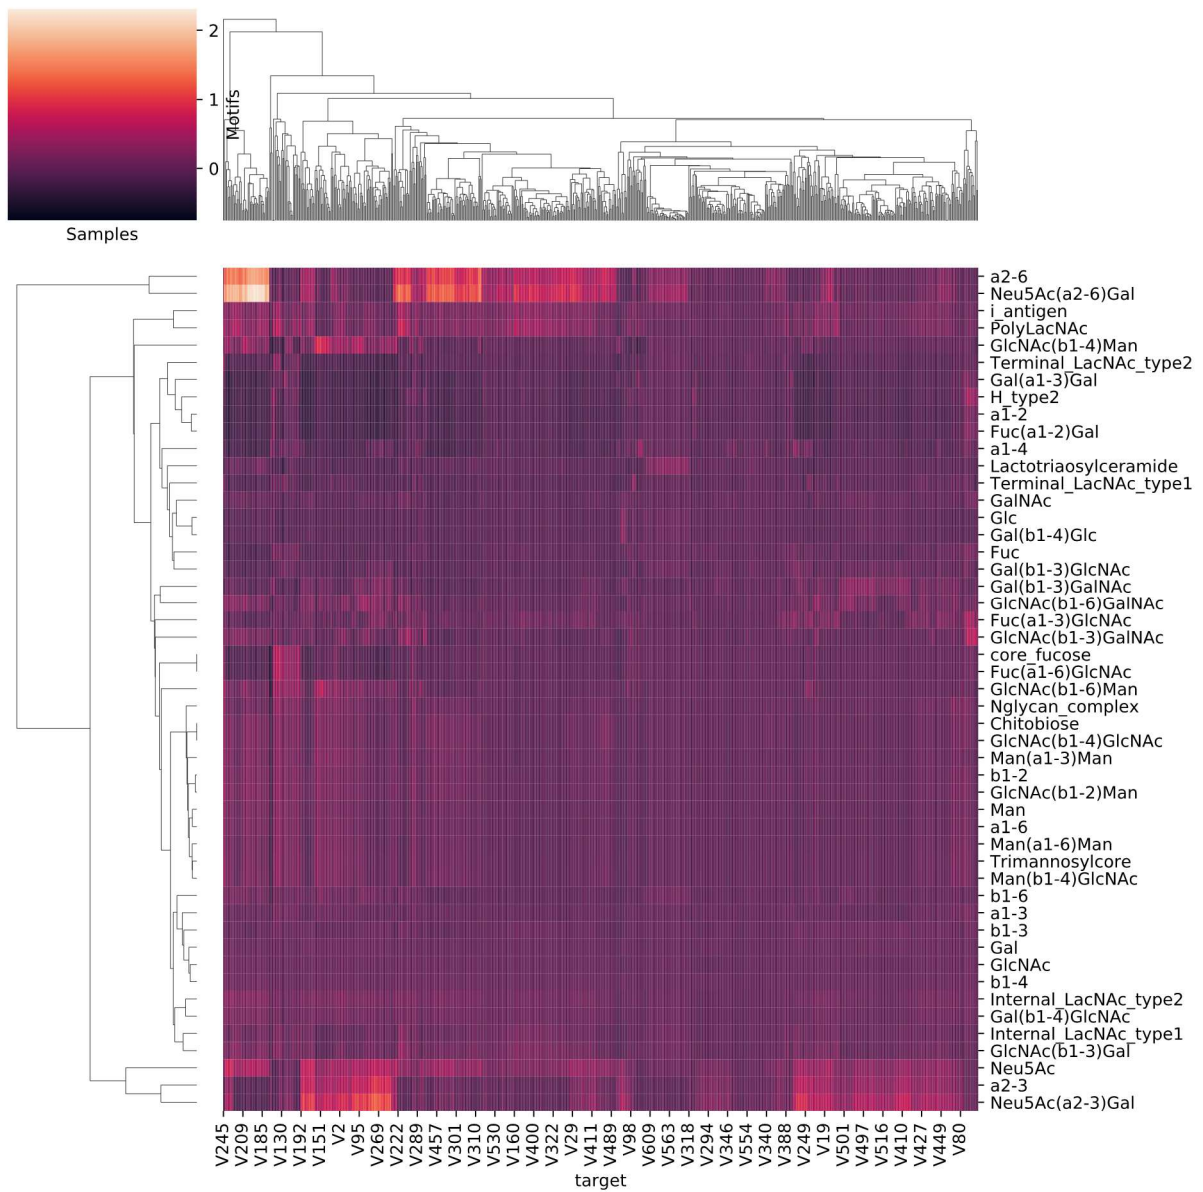

**Figure S2. Motif-based heatmap of glycan binding specificities between influenza strains.** Related to Figure 2C. The heatmap is generated by the `make_heatmap` function and displays the measured glycan binding efficiency (Z-score) of various influenza strains for diverse motifs. The color gradient represents Z-scores associated with a motif. Motifs are labeled as monosaccharides, linkages, disaccharides, or larger structures. Influenza strains are represented by their identifiers.

## Supplementary Tables

**Table SI. Statistical significance of glycan binding specificities of influenza viruses.** Related to Figure 2C. This table corresponds to the full table generated using the `get_pvals_motifs` function. The `pval` and `corr_pval` columns contain p-values and corrected p-values (corrected by the Holm-Šidák method) respectively, which represent the statistical significance for each binding motif. Columns are sorted ascendingly by p-values.

| motif                 | pval                    | corr_pval |
|-----------------------|-------------------------|-----------|
| Internal_LacNAc_type2 | 0.0                     | 0.0       |
| Neu5Ac                | 0.0                     | 0.0       |
| a2-3                  | 0.0                     | 0.0       |
| a2-6                  | 0.0                     | 0.0       |
| Gal(b1-4)GlcNAc       | 0.0                     | 0.0       |
| Neu5Ac(a2-3)Gal       | 0.0                     | 0.0       |
| Neu5Ac(a2-6)Gal       | 0.0                     | 0.0       |
| i_antigen             | 9.53871705085845e-194   | 0.0       |
| VIM                   | 7.690771572918131e-181  | 0.0       |
| b1-4                  | 4.671886339472552e-174  | 0.0       |
| PolyLacNAc            | 4.703869237162888e-155  | 0.0       |
| Gal(b1-4)GlcNAcOS     | 1.0314895321484356e-108 | 0.0       |
| GlcNAc(b1-3)Gal       | 2.761773896229227e-106  | 0.0       |
| Gal                   | 1.1530767361645484e-94  | 0.0       |
| GlcNAc                | 1.1703728505419271e-86  | 0.0       |
| GlcNAcOS              | 1.8129332905909683e-86  | 0.0       |
| SialylLewisX          | 2.8909637444671393e-60  | 0.0       |
| GlcNAc(b1-2)Man       | 1.1025544114971412e-59  | 0.0       |
| Neu5Ac(a2-6)GalNAc    | 2.779528553149326e-59   | 0.0       |
| b1-2                  | 6.652734627105335e-56   | 0.0       |
| Fuc_LN3               | 6.652681483864124e-46   | 0.0       |
| Oglycan_core2         | 6.717992600099721e-46   | 0.0       |
| Internal_LacNAc_type1 | 5.155571589264967e-43   | 0.0       |
| bisectingGlcNAc       | 3.562003433491632e-37   | 0.0       |
| Chitobiose            | 2.835833054849996e-36   | 0.0       |
| GlcNAc(b1-4)GlcNAc    | 2.835833054849996e-36   | 0.0       |
| LexLex                | 2.096418371667195e-34   | 0.0       |
| Man(a1-3)Man          | 1.7473001542302298e-33  | 0.0       |

|                                |                        |                        |
|--------------------------------|------------------------|------------------------|
| <b>Gal(b1-3)GalNAcOS</b>       | 3.923738240471641e-33  | 0.0                    |
| <b>Neu5Ac(a2-6)GlcNAc</b>      | 6.491293865539391e-33  | 0.0                    |
| <b>Disialyl_T_antigen</b>      | 5.778262296664894e-32  | 0.0                    |
| <b>Neu5Ac(a2-3)GalOS</b>       | 3.8889908326093376e-31 | 0.0                    |
| <b>Nglycan_complex2</b>        | 1.328706611653617e-30  | 0.0                    |
| <b>Man(b1-4)GlcNAc</b>         | 2.7416848220399755e-28 | 0.0                    |
| <b>Internal_LacdiNAc_type2</b> | 7.054007106134345e-28  | 0.0                    |
| <b>Man(a1-3)GalNAc</b>         | 7.876721632785831e-28  | 0.0                    |
| <b>Man(a1-6)GalNAc</b>         | 7.876721632785831e-28  | 0.0                    |
| <b>GlcNAc(b1-4)Man</b>         | 1.6059572572004042e-23 | 0.0                    |
| <b>Trimannosylcore</b>         | 1.661513107391722e-23  | 0.0                    |
| <b>SDLex</b>                   | 7.71176740084554e-23   | 0.0                    |
| <b>Nglycan_complex</b>         | 1.6189628923989955e-22 | 0.0                    |
| <b>Fuc(a1-3)GlcNAcOS</b>       | 8.444679157958654e-22  | 0.0                    |
| <b>GalNAcOS</b>                | 2.5656441621709624e-20 | 0.0                    |
| <b>VIM2</b>                    | 8.025104518698597e-20  | 0.0                    |
| <b>GlcNAc(b1-6)GalNAc</b>      | 9.802382312005959e-20  | 0.0                    |
| <b>Gal(b1-3)Neu5Ac</b>         | 7.752261303193785e-18  | 0.0                    |
| <b>SialylLewisA</b>            | 2.988068353502674e-16  | 7.127631818093505e-14  |
| <b>GalNAc(b1-4)GlcNAc</b>      | 6.198036366270052e-15  | 1.3242740237728867e-12 |
| <b>Tetraantennary_Nglycan</b>  | 1.9453714871974113e-12 | 4.1241055015461825e-10 |
| <b>Man(a1-6)Man</b>            | 4.836313046316612e-12  | 1.0204705969130146e-09 |
| <b>GalOS(b1-4)GlcNAc</b>       | 6.381181214224658e-11  | 1.3400487275383455e-08 |
| <b>Oglycan_core4</b>           | 1.5171044957836459e-10 | 3.170747764347226e-08  |
| <b>3SGb5</b>                   | 4.748624064051575e-09  | 9.877133169133856e-07  |
| <b>Gal(b1-3)GlcNAcOS</b>       | 6.8614375221294304e-09 | 1.420316564804125e-06  |
| <b>Fuc(a1-3)GlcNAc</b>         | 9.90774947281499e-09   | 2.04099432632443e-06   |
| <b>GlcNAc(b1-6)Man</b>         | 1.0499359020091819e-08 | 2.152366299967845e-06  |
| <b>Internal_LacdiNAc_type1</b> | 1.5451739230697985e-07 | 3.152105367087987e-05  |
| <b>O_linked_mannose</b>        | 4.71811168309478e-06   | 0.0009573204072889085  |
| <b>Gal(b1-3)GalNAc</b>         | 1.2858455438171447e-05 | 0.0025940543091963475  |
| <b>b1-3</b>                    | 1.4242938188232921e-05 | 0.002858756913576621   |
| <b>GalNAc(b1-4)GlcNAcOS</b>    | 3.767002993218919e-05  | 0.0075058373441107     |
| <b>Neu5Ac(a2-3)GalNAc</b>      | 0.00020169042885934986 | 0.03934548795688764    |
| <b>GD1a</b>                    | 0.0002554733662579807  | 0.04933181502348283    |
| <b>cisGM1</b>                  | 0.001935522473804221   | 0.31727791769295943    |
| <b>b1-6</b>                    | 0.004427371372422693   | 0.5809191575428146     |
| <b>Fuc(a1-3)Gal</b>            | 0.00950655484692593    | 0.8447387292261651     |
| <b>Man</b>                     | 0.07213014831453363    | 0.9999995074045557     |
| <b>GlcNAcOS(b1-3)GalOS</b>     | 0.10862369038043973    | 0.999999997699671      |
| <b>LewisX</b>                  | 1.0                    | 1.0                    |

|                         |     |     |
|-------------------------|-----|-----|
| LewisY                  | 1.0 | 1.0 |
| LewisA                  | 1.0 | 1.0 |
| LewisB                  | 1.0 | 1.0 |
| H_type2                 | 1.0 | 1.0 |
| H_type1                 | 1.0 | 1.0 |
| A_antigen               | 1.0 | 1.0 |
| Galili_antigen          | 1.0 | 1.0 |
| GloboH                  | 1.0 | 1.0 |
| Gb5                     | 1.0 | 1.0 |
| Gb4                     | 1.0 | 1.0 |
| Gb3                     | 1.0 | 1.0 |
| Forssman_antigen        | 1.0 | 1.0 |
| iGb3                    | 1.0 | 1.0 |
| I_antigen               | 1.0 | 1.0 |
| Terminal_LacNAc_type1   | 1.0 | 1.0 |
| Terminal_LacNAc_type2   | 1.0 | 1.0 |
| Terminal_LacdiNAc_type1 | 1.0 | 1.0 |
| Terminal_LacdiNAc_type2 | 1.0 | 1.0 |
| Ganglio_Series          | 1.0 | 1.0 |
| Lacto_Series(LewisC)    | 1.0 | 1.0 |
| NeoLacto_Series         | 1.0 | 1.0 |
| LewisD                  | 1.0 | 1.0 |
| Lactotriaosylceramide   | 1.0 | 1.0 |
| GM3                     | 1.0 | 1.0 |
| H_type3                 | 1.0 | 1.0 |
| GM2                     | 1.0 | 1.0 |
| GM1                     | 1.0 | 1.0 |
| GD3                     | 1.0 | 1.0 |
| GD2                     | 1.0 | 1.0 |
| GD1b                    | 1.0 | 1.0 |
| Nglycolyl_GM2           | 1.0 | 1.0 |
| GT1b                    | 1.0 | 1.0 |
| GD1                     | 1.0 | 1.0 |
| GD1a_2                  | 1.0 | 1.0 |
| GT3                     | 1.0 | 1.0 |
| GT2                     | 1.0 | 1.0 |
| GT1c                    | 1.0 | 1.0 |
| 2Fuc_GM1                | 1.0 | 1.0 |
| GQ1b                    | 1.0 | 1.0 |
| O_mannose_Lex           | 1.0 | 1.0 |
| core_fucose             | 1.0 | 1.0 |

|                                  |     |     |
|----------------------------------|-----|-----|
| <b>Isoglobotetraosylceramide</b> | 1.0 | 1.0 |
| <b>polySia</b>                   | 1.0 | 1.0 |
| <b>high_mannose</b>              | 1.0 | 1.0 |
| <b>Gala_series</b>               | 1.0 | 1.0 |
| <b>Oglycan_core3</b>             | 1.0 | 1.0 |
| <b>Oglycan_core5</b>             | 1.0 | 1.0 |
| <b>Oglycan_core6</b>             | 1.0 | 1.0 |
| <b>Sialosylparagloboside</b>     | 1.0 | 1.0 |
| <b>LDNF</b>                      | 1.0 | 1.0 |
| <b>4dGal</b>                     | 1.0 | 1.0 |
| <b>4dNeu5Ac</b>                  | 1.0 | 1.0 |
| <b>6dGal</b>                     | 1.0 | 1.0 |
| <b>7dNeu5Ac</b>                  | 1.0 | 1.0 |
| <b>8dNeu5Ac</b>                  | 1.0 | 1.0 |
| <b>9dNeu5Ac</b>                  | 1.0 | 1.0 |
| <b>Fuc</b>                       | 1.0 | 1.0 |
| <b>GalNAc</b>                    | 1.0 | 1.0 |
| <b>GalOP</b>                     | 1.0 | 1.0 |
| <b>GalOS</b>                     | 1.0 | 1.0 |
| <b>Glc</b>                       | 1.0 | 1.0 |
| <b>GlcA</b>                      | 1.0 | 1.0 |
| <b>GlcN</b>                      | 1.0 | 1.0 |
| <b>GlcNAcOP</b>                  | 1.0 | 1.0 |
| <b>GlcNAcOProp</b>               | 1.0 | 1.0 |
| <b>GlcOS</b>                     | 1.0 | 1.0 |
| <b>GlcOSA</b>                    | 1.0 | 1.0 |
| <b>Kdn</b>                       | 1.0 | 1.0 |
| <b>MurNAc</b>                    | 1.0 | 1.0 |
| <b>Neu</b>                       | 1.0 | 1.0 |
| <b>Neu5Ac9Ac</b>                 | 1.0 | 1.0 |
| <b>Neu5AcOMe</b>                 | 1.0 | 1.0 |
| <b>Neu5Gc</b>                    | 1.0 | 1.0 |
| <b>a1-2</b>                      | 1.0 | 1.0 |
| <b>a1-3</b>                      | 1.0 | 1.0 |
| <b>a1-4</b>                      | 1.0 | 1.0 |
| <b>a1-6</b>                      | 1.0 | 1.0 |
| <b>a2-8</b>                      | 1.0 | 1.0 |
| <b>a2-9</b>                      | 1.0 | 1.0 |
| <b>b2-3</b>                      | 1.0 | 1.0 |
| <b>b2-6</b>                      | 1.0 | 1.0 |
| <b>4dGal(b1-4)GlcNAc</b>         | 1.0 | 1.0 |

|                    |     |     |
|--------------------|-----|-----|
| 4dNeu5Ac(a2-3)Gal  | 1.0 | 1.0 |
| 6dGal(b1-4)GlcNAc  | 1.0 | 1.0 |
| 7dNeu5Ac(a2-3)Gal  | 1.0 | 1.0 |
| 8dNeu5Ac(a2-3)Gal  | 1.0 | 1.0 |
| 9dNeu5Ac(a2-3)Gal  | 1.0 | 1.0 |
| Fuc(a1-2)Gal       | 1.0 | 1.0 |
| Fuc(a1-2)GalOS     | 1.0 | 1.0 |
| Fuc(a1-2)GlcNAc    | 1.0 | 1.0 |
| Fuc(a1-3)Glc       | 1.0 | 1.0 |
| Fuc(a1-3)GlcN      | 1.0 | 1.0 |
| Fuc(a1-3)GlcOS     | 1.0 | 1.0 |
| Fuc(a1-4)GlcNAc    | 1.0 | 1.0 |
| Fuc(a1-6)GlcNAc    | 1.0 | 1.0 |
| Fuc(b1-3)GlcNAc    | 1.0 | 1.0 |
| Gal(a1-2)Gal       | 1.0 | 1.0 |
| Gal(a1-3)Fuc       | 1.0 | 1.0 |
| Gal(a1-3)Gal       | 1.0 | 1.0 |
| Gal(a1-3)GalNAc    | 1.0 | 1.0 |
| Gal(a1-4)Gal       | 1.0 | 1.0 |
| Gal(a1-4)GlcNAc    | 1.0 | 1.0 |
| Gal(a1-6)Gal       | 1.0 | 1.0 |
| Gal(a1-6)Glc       | 1.0 | 1.0 |
| Gal(b1-2)Gal       | 1.0 | 1.0 |
| Gal(b1-3)Gal       | 1.0 | 1.0 |
| Gal(b1-3)GlcN      | 1.0 | 1.0 |
| Gal(b1-3)GlcNAc    | 1.0 | 1.0 |
| Gal(b1-4)Fuc       | 1.0 | 1.0 |
| Gal(b1-4)Gal       | 1.0 | 1.0 |
| Gal(b1-4)GalNAc    | 1.0 | 1.0 |
| Gal(b1-4)Glc       | 1.0 | 1.0 |
| Gal(b1-4)GlcNAcOP  | 1.0 | 1.0 |
| Gal(b1-4)GlcOS     | 1.0 | 1.0 |
| Gal(b1-6)Gal       | 1.0 | 1.0 |
| Gal(b1-6)GalNAc    | 1.0 | 1.0 |
| GalNAc(a1-3)Fuc    | 1.0 | 1.0 |
| GalNAc(a1-3)Gal    | 1.0 | 1.0 |
| GalNAc(a1-3)GalNAc | 1.0 | 1.0 |
| GalNAc(a1-4)Gal    | 1.0 | 1.0 |
| GalNAc(b1-3)Gal    | 1.0 | 1.0 |
| GalNAc(b1-3)GalNAc | 1.0 | 1.0 |
| GalNAc(b1-3)GlcNAc | 1.0 | 1.0 |



|                                |     |     |
|--------------------------------|-----|-----|
| <b>GalNAc(b1-4)Gal</b>         | 1.0 | 1.0 |
| <b>GalNAc(b1-6)Gal</b>         | 1.0 | 1.0 |
| <b>GalNAc(b1-6)GalNAc</b>      | 1.0 | 1.0 |
| <b>GalNAcOS(b1-4)Gal</b>       | 1.0 | 1.0 |
| <b>GalNAcOS(b1-4)GlcNAc</b>    | 1.0 | 1.0 |
| <b>GalNAcOS(b1-4)GlcNAcOS</b>  | 1.0 | 1.0 |
| <b>GalOP(b1-4)GlcNAc</b>       | 1.0 | 1.0 |
| <b>GalOS(b1-3)GalNAc</b>       | 1.0 | 1.0 |
| <b>GalOS(b1-3)GlcNAc</b>       | 1.0 | 1.0 |
| <b>GalOS(b1-3)GlcNAcOS</b>     | 1.0 | 1.0 |
| <b>GalOS(b1-4)Glc</b>          | 1.0 | 1.0 |
| <b>GalOS(b1-4)GlcN</b>         | 1.0 | 1.0 |
| <b>GalOS(b1-4)GlcNAcOS</b>     | 1.0 | 1.0 |
| <b>GalOS(b1-4)GlcOS</b>        | 1.0 | 1.0 |
| <b>Glc(a1-4)Glc</b>            | 1.0 | 1.0 |
| <b>Glc(a1-6)Glc</b>            | 1.0 | 1.0 |
| <b>Glc(b1-4)Glc</b>            | 1.0 | 1.0 |
| <b>Glc(b1-6)Glc</b>            | 1.0 | 1.0 |
| <b>GlcA(b1-3)Gal</b>           | 1.0 | 1.0 |
| <b>GlcA(b1-3)GlcNAc</b>        | 1.0 | 1.0 |
| <b>GlcA(b1-6)Gal</b>           | 1.0 | 1.0 |
| <b>GlcN(b1-3)Gal</b>           | 1.0 | 1.0 |
| <b>GlcNAc(a1-3)Gal</b>         | 1.0 | 1.0 |
| <b>GlcNAc(a1-4)Gal</b>         | 1.0 | 1.0 |
| <b>GlcNAc(a1-6)Gal</b>         | 1.0 | 1.0 |
| <b>GlcNAc(b1-2)Gal</b>         | 1.0 | 1.0 |
| <b>GlcNAc(b1-2)GlcNAc</b>      | 1.0 | 1.0 |
| <b>GlcNAc(b1-3)Fuc</b>         | 1.0 | 1.0 |
| <b>GlcNAc(b1-3)GalNAc</b>      | 1.0 | 1.0 |
| <b>GlcNAc(b1-3)GlcNAc</b>      | 1.0 | 1.0 |
| <b>GlcNAc(b1-3)Man</b>         | 1.0 | 1.0 |
| <b>GlcNAc(b1-4)</b>            | 1.0 | 1.0 |
| <b>GlcNAc(b1-4)Gal</b>         | 1.0 | 1.0 |
| <b>GlcNAc(b1-4)GalNAc</b>      | 1.0 | 1.0 |
| <b>GlcNAc(b1-6)Gal</b>         | 1.0 | 1.0 |
| <b>GlcNAc(b1-6)GlcNAc</b>      | 1.0 | 1.0 |
| <b>GlcNAcOProp(b1-4)GlcNAc</b> | 1.0 | 1.0 |
| <b>GlcNAcOS(b1-3)Gal</b>       | 1.0 | 1.0 |
| <b>GlcOSA(b1-3)Gal</b>         | 1.0 | 1.0 |
| <b>Kdn(a2-3)Gal</b>            | 1.0 | 1.0 |

|                           |     |     |
|---------------------------|-----|-----|
| <b>Kdn(a2-6)Gal</b>       | 1.0 | 1.0 |
| <b>Man(a1-2)Man</b>       | 1.0 | 1.0 |
| <b>Man(a1-3)Gal</b>       | 1.0 | 1.0 |
| <b>Man(a1-3)GlcNAc</b>    | 1.0 | 1.0 |
| <b>Man(a1-6)GlcNAc</b>    | 1.0 | 1.0 |
| <b>MurNAc(b1-4)GlcNAc</b> | 1.0 | 1.0 |
| <b>Neu(a2-3)Gal</b>       | 1.0 | 1.0 |
| <b>Neu(a2-3)GalOS</b>     | 1.0 | 1.0 |
| <b>Neu(a2-6)Gal</b>       | 1.0 | 1.0 |
| <b>Neu5Ac(a2-3)4dGal</b>  | 1.0 | 1.0 |
| <b>Neu5Ac(a2-3)6dGal</b>  | 1.0 | 1.0 |
| <b>Neu5Ac(a2-8)Neu5Ac</b> | 1.0 | 1.0 |
| <b>Neu5Ac(a2-8)Neu5Gc</b> | 1.0 | 1.0 |
| <b>Neu5Ac(a2-9)Neu5Ac</b> | 1.0 | 1.0 |
| <b>Neu5Ac(b1-6)GalNAc</b> | 1.0 | 1.0 |
| <b>Neu5Ac(b2-3)Gal</b>    | 1.0 | 1.0 |
| <b>Neu5Ac(b2-6)Gal</b>    | 1.0 | 1.0 |
| <b>Neu5Ac(b2-6)GalNAc</b> | 1.0 | 1.0 |
| <b>Neu5Ac9Ac(a2-3)Gal</b> | 1.0 | 1.0 |
| <b>Neu5Ac9Ac(a2-6)Gal</b> | 1.0 | 1.0 |
| <b>Neu5AcOMe(a2-3)Gal</b> | 1.0 | 1.0 |
| <b>Neu5Gc(a2-3)Gal</b>    | 1.0 | 1.0 |
| <b>Neu5Gc(a2-6)Gal</b>    | 1.0 | 1.0 |
| <b>Neu5Gc(a2-6)GalNAc</b> | 1.0 | 1.0 |
| <b>Neu5Gc(a2-8)Neu5Ac</b> | 1.0 | 1.0 |
| <b>Neu5Gc(a2-8)Neu5Gc</b> | 1.0 | 1.0 |
| <b>Neu5Gc(b2-6)Gal</b>    | 1.0 | 1.0 |
